# Supplementary material
Source: PubMed Central journal article supplement (PMC6620113)

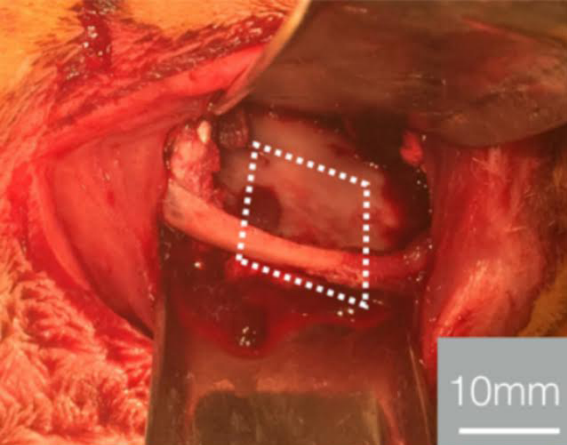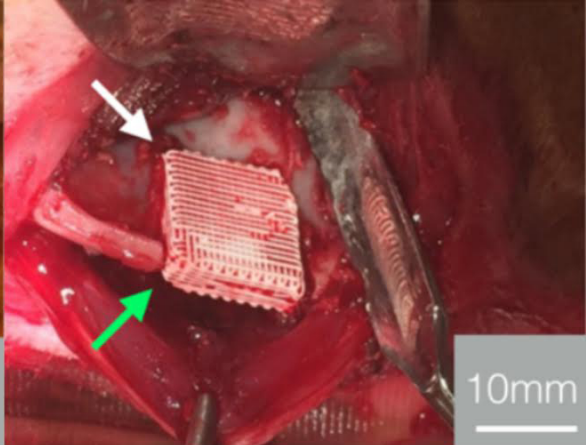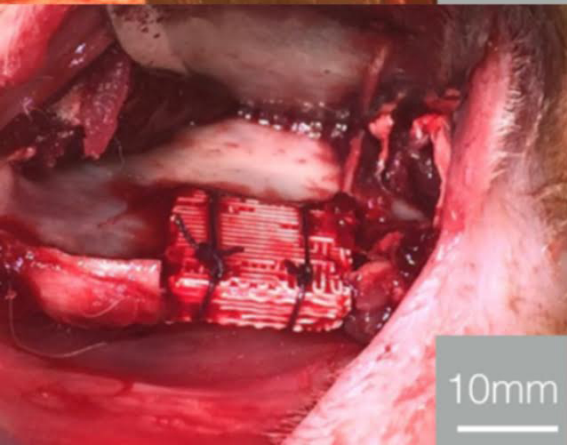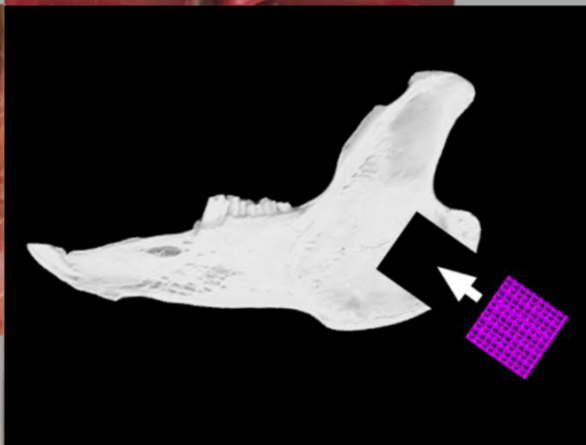

Supplement: NIHMS1517470-supplement-Supplemental_Digital_Content_1.pdf [file NIHMS1517470-supplement-Supplemental_Digital_Content_1.pdf]
